# Supplementary material for: Case Presentation: Functional Assessment of a CASR Variant Identified in a Patient with Hypercalcaemia Confirms Familial Hypocalciuric Hypercalcaemia in the Patient and a Sister Previously Misdiagnosed with Primary Hyperparathyroidism
Source: Hindawi journal article supplement (doi:10.1155/2024/6652801), 2024-02-03
Supplement: f1 [file 6652801.f1.zip]

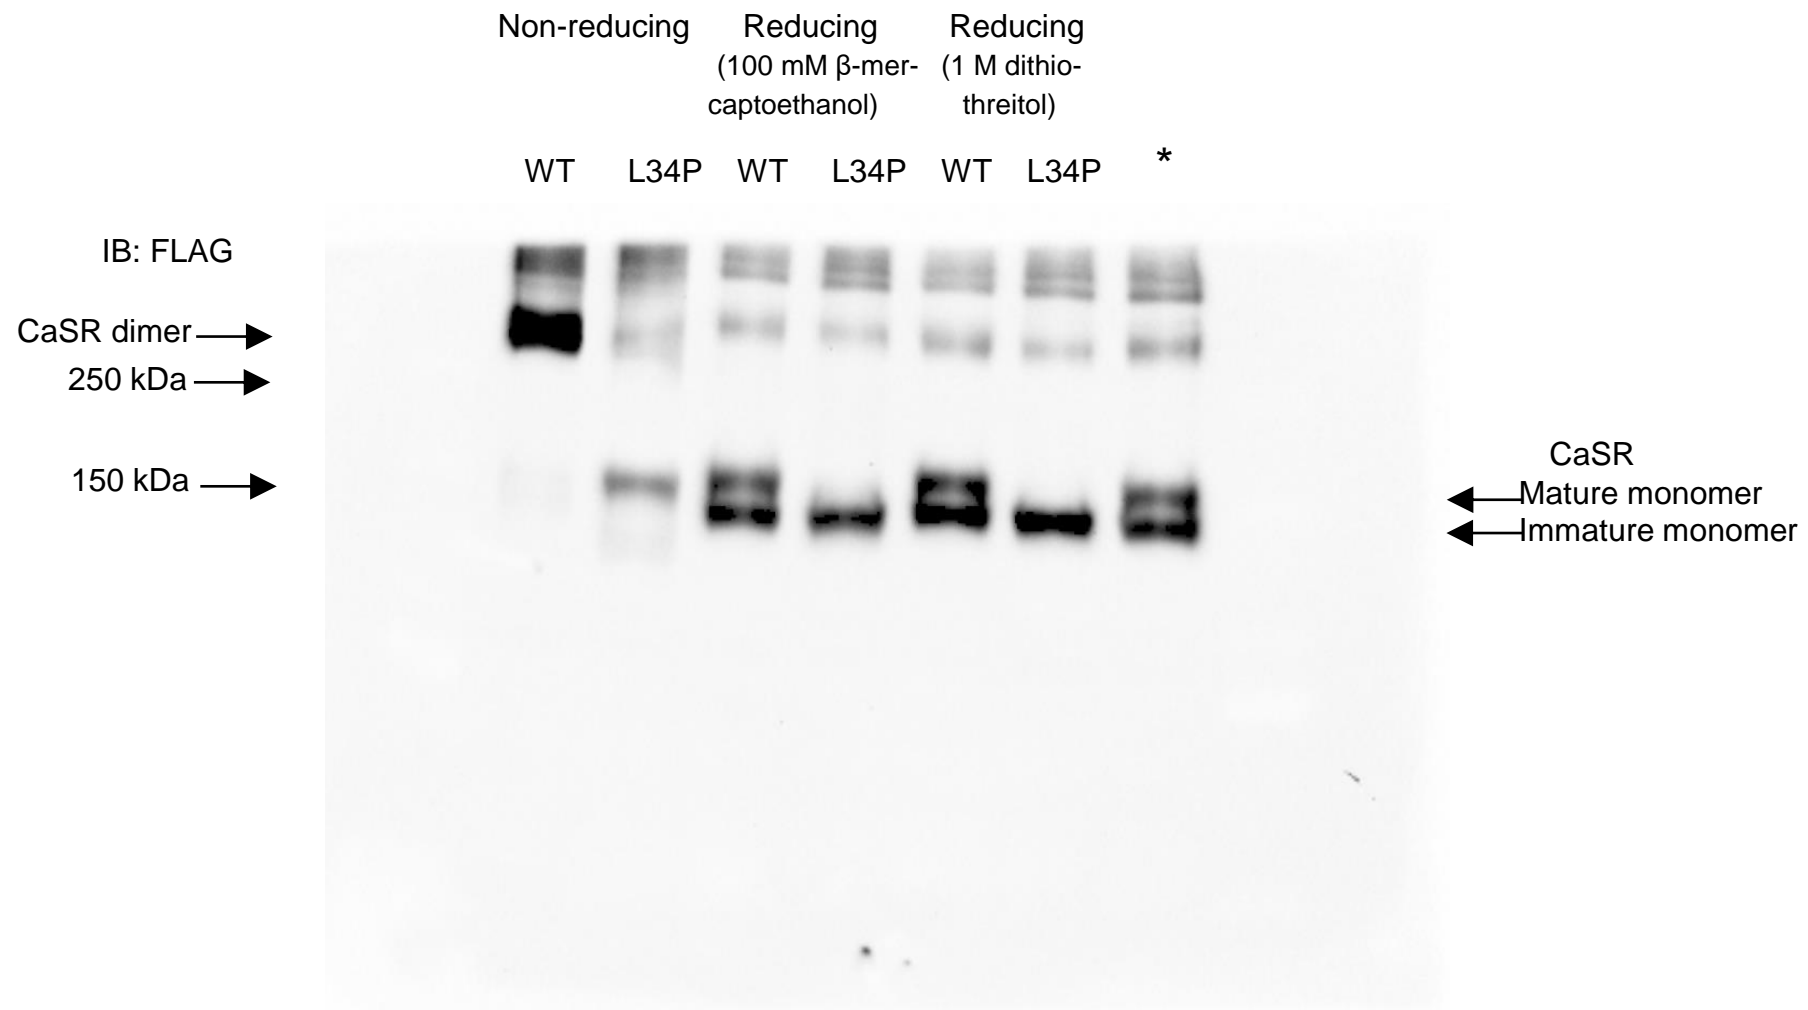

**Supplementary Fig. 1** Western blot analysis of wild type and L34P variant CaSR examined under non-reducing and reducing conditions. HEK293 cells were transfected with wild type or variant CaSR-FLAG-tagged plasmid, incubated for 48 hr and the cells then lysed and 80  $\mu$ g of protein with or without reducing agent separated by SDS-PAGE. The gel was blotted then probed with mouse monoclonal antibody to FLAG-tag followed by goat anti-mouse HRP-conjugated secondary antibody. Protein bands were visualized using ECL chemiluminescence reagent in a Bio-Rad Molecular Imager. \*An additional lane is a duplicate of lane 3, WT under reducing ( $\beta$ -mercaptoethanol) conditions.
