# Supplementary material for: Case Presentation: Functional Assessment of a CASR Variant Identified in a Patient with Hypercalcaemia Confirms Familial Hypocalciuric Hypercalcaemia in the Patient and a Sister Previously Misdiagnosed with Primary Hyperparathyroidism
Source: Hindawi journal article supplement (doi:10.1155/2024/6652801), 2024-02-03
Supplement: f1 [file 6652801.f1.zip]

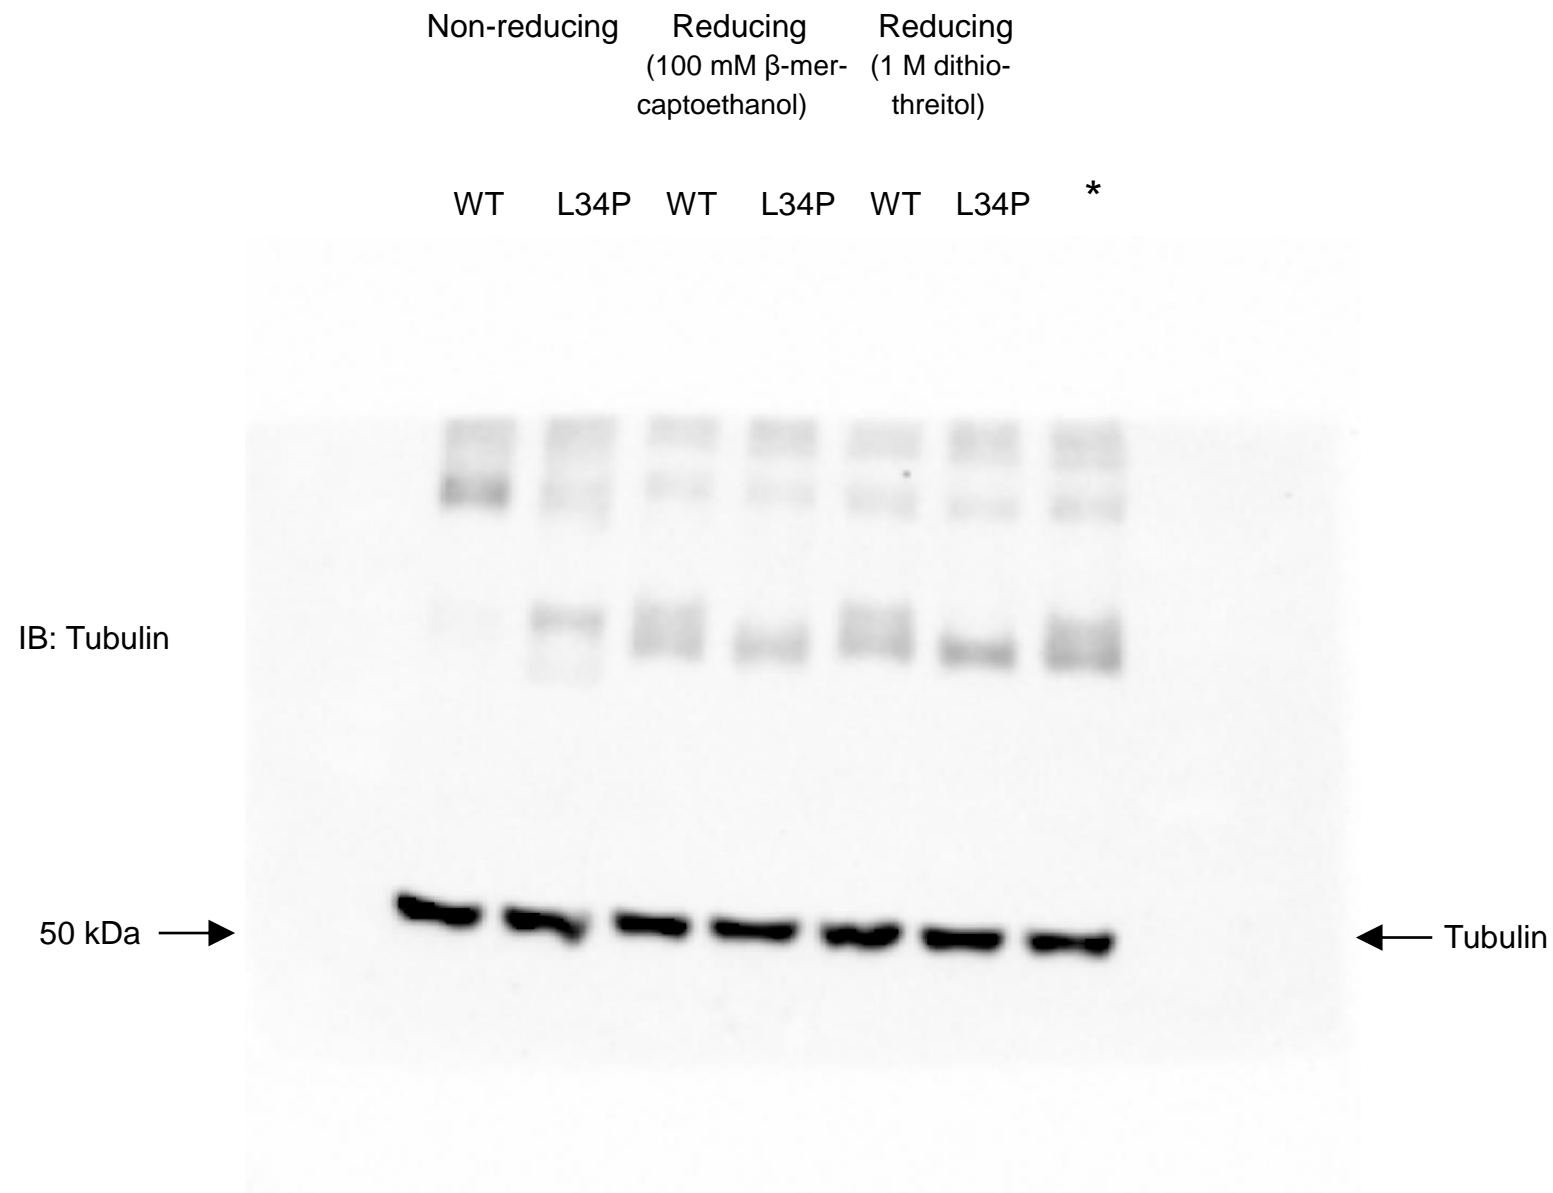

**Supplementary Fig. 2** Western blot analysis of the same blot shown in Supplementary Fig. 1 re-probed with mouse monoclonal antibody to  $\alpha$ -tubulin (as a loading control) followed by goat anti-mouse HRP-conjugated secondary antibody. Protein bands were visualized using ECL chemiluminescence reagent in a Bio-Rad Molecular Imager. \*An additional lane is a duplicate of lane 3, WT under reducing ( $\beta$ -mercaptoethanol) conditions. Note that weak CaSR signal is from previous exposure to FLAG-tag antibody.
